# Supplementary material
Source: PubMed Central journal article supplement (PMC2698768)

789 **Online Supplemental Material**

790 **Supplemental Figure 1:** **A)** Design of the knockin construct used to construct the mice.  
791 **B)** amino acid sequence of the cytoplasmic domain of wild type and mutant CD28  
792 proteins. The proximal and distal motifs are boxed. **C)** Southern blot analysis of DNA  
793 extracted from mice heterozygous for the mutant CD28-Y170F allele prior to removal of  
794 the Neo cassette with Cre-recombinase. The DNA was digested with Bgl2 and probed  
795 with the 5' external probe. **D)** DNA was isolated from mice of the indicated genotypes  
796 and exon IV amplified by PCR. The product was then digested with BspH1 to confirm  
797 the presence of the mutation. **E)** PCR analysis of DNA isolated from post-Cre mice of  
798 each genotype. Using primers p1 and p2 (illustrated in panel a), the post cre allele can be  
799 distinguished from the endogenous CD28 allele due to the remaining small amount of  
800 foreign DNA.

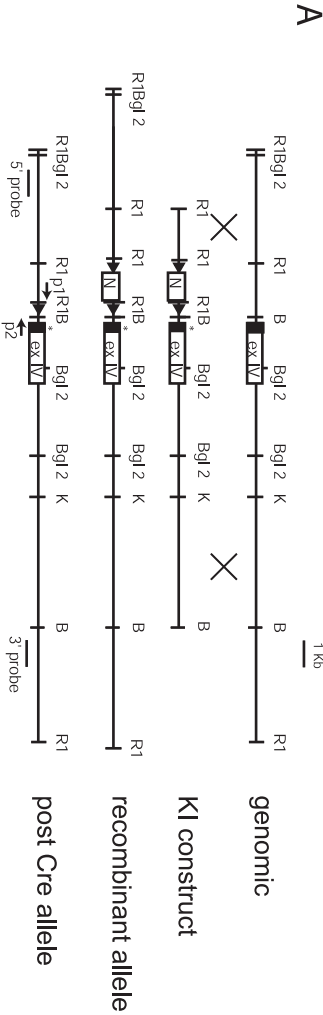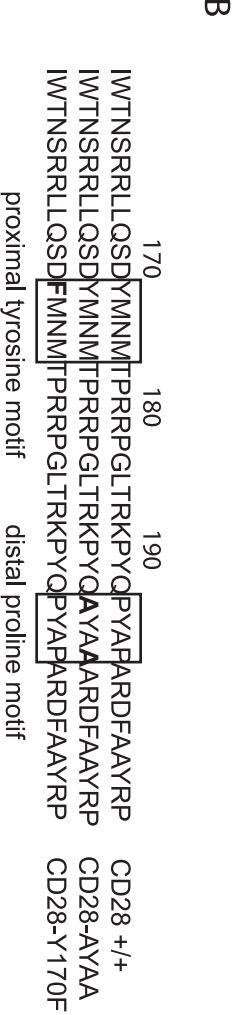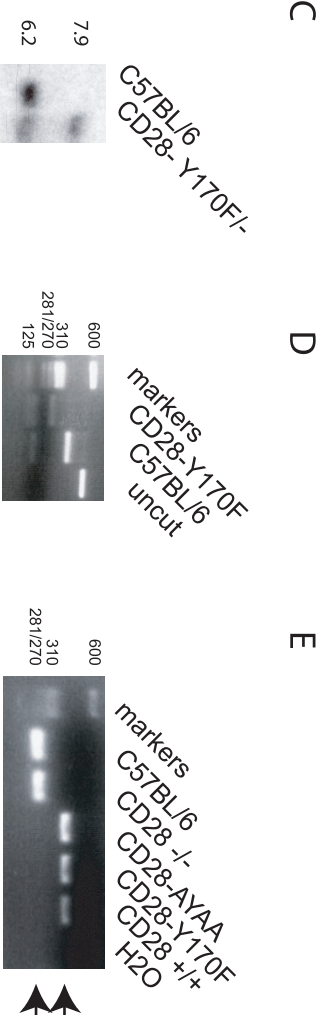

Supplement: supp_29_13_3710__1.pdf [file supp_29_13_3710__1.pdf]
